# Supplementary material
Source: publisher figshare collection journal article supplement (https://tandf.figshare.com/ndownloader/files/20394702)
Supplement: Supplementary file 1 [file 20394702]

The Lissajous figures, and current and voltage waveforms in manuscript are shown as follows.


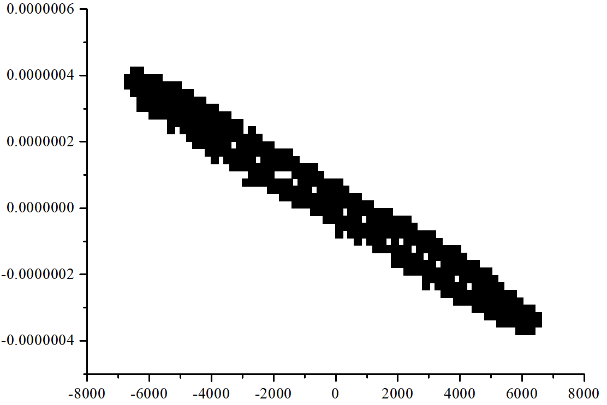

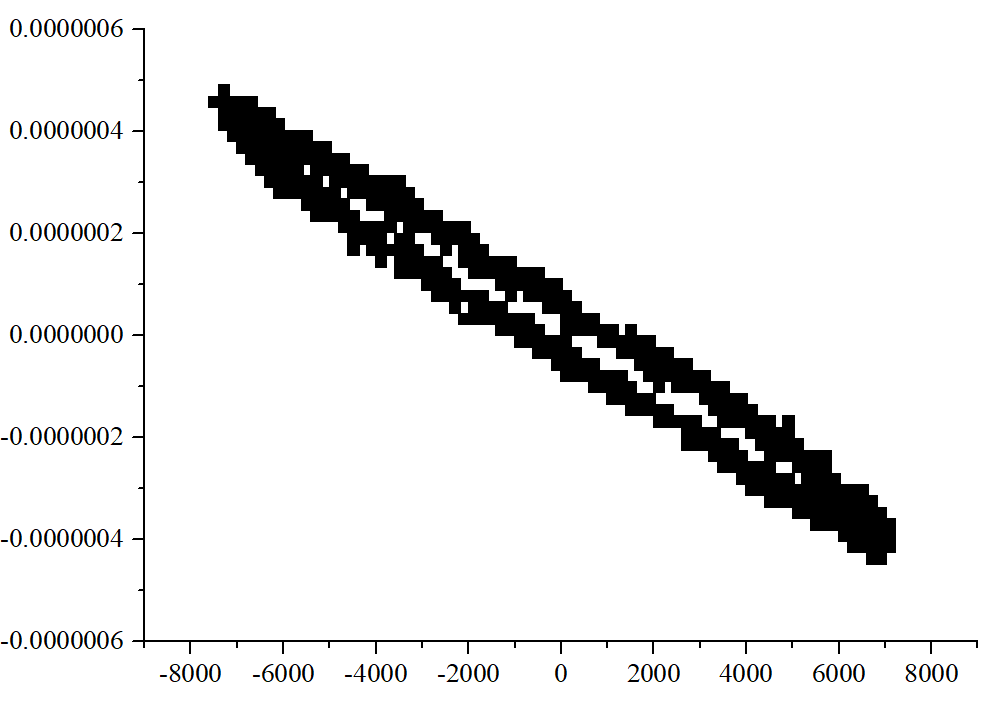


(b)

(a)


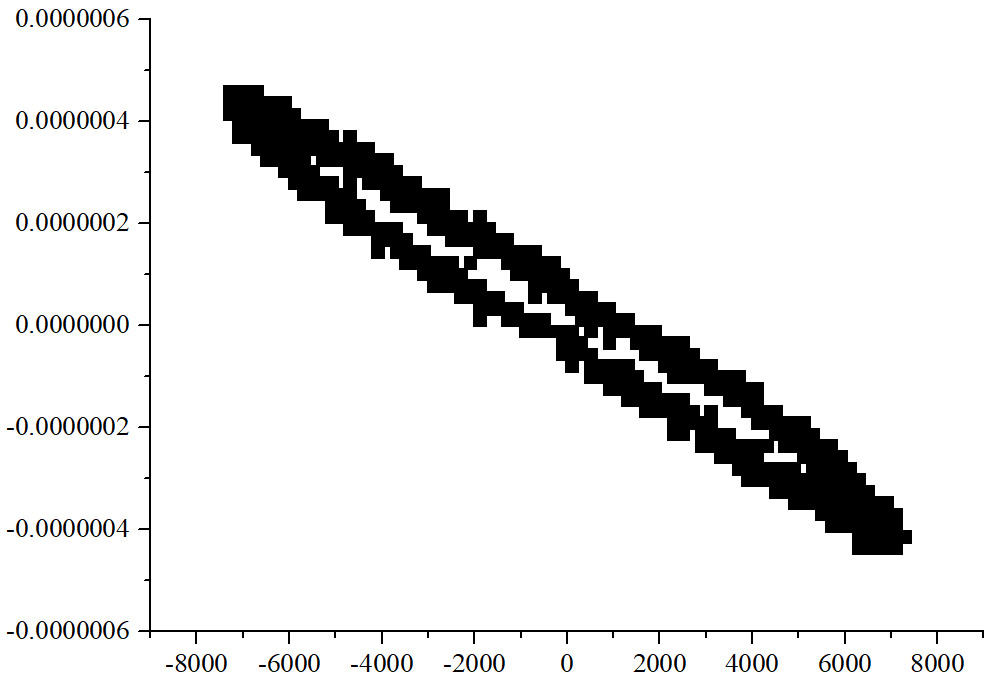

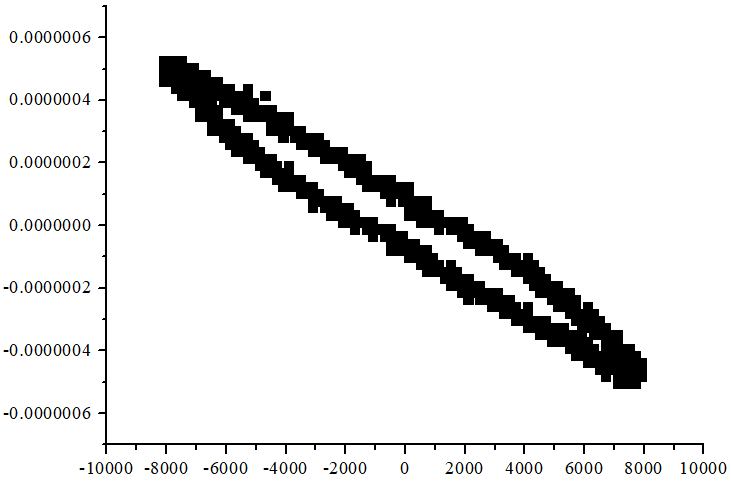


(d)

(c)


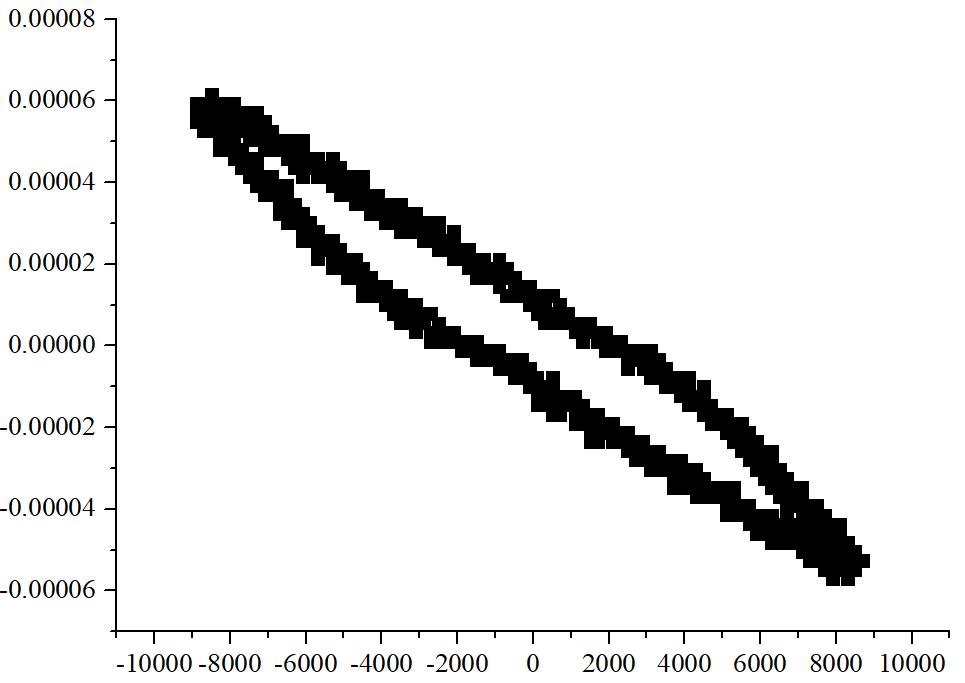


(e)

*(a) the Lissajous figure with 270 J/L, (b) the Lissajous figure with 320 J/L, (c) the Lissajous figure with 389 J/L, (d) the Lissajous figure with 435 J/L, (e) the Lissajous figure with 504 J/L.
